# Supplementary material
Source: bioRxiv or medRxiv preprint supplement (https://www.biorxiv.org/highwire/filestream/15548/field_highwire_adjunct_files/0/056614-1.pdf)

**A**

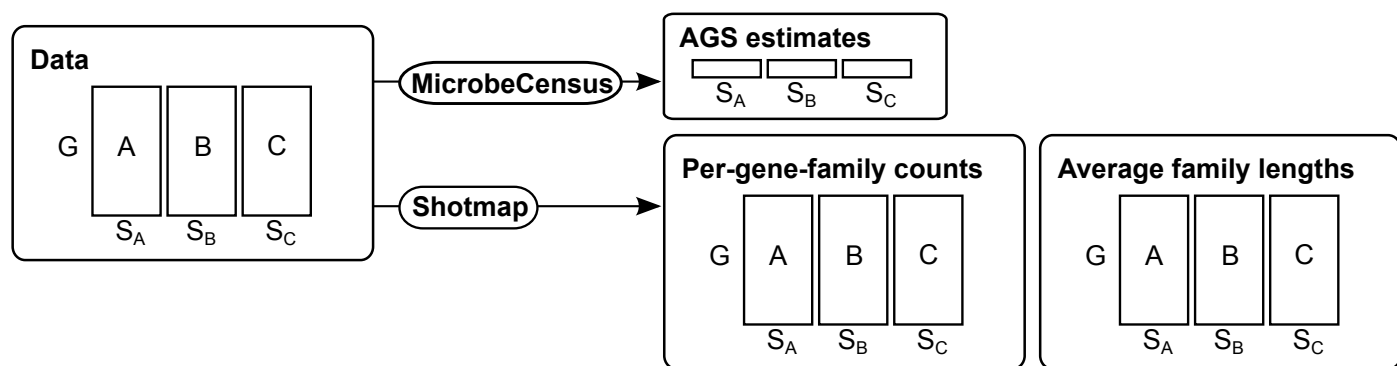

**B**

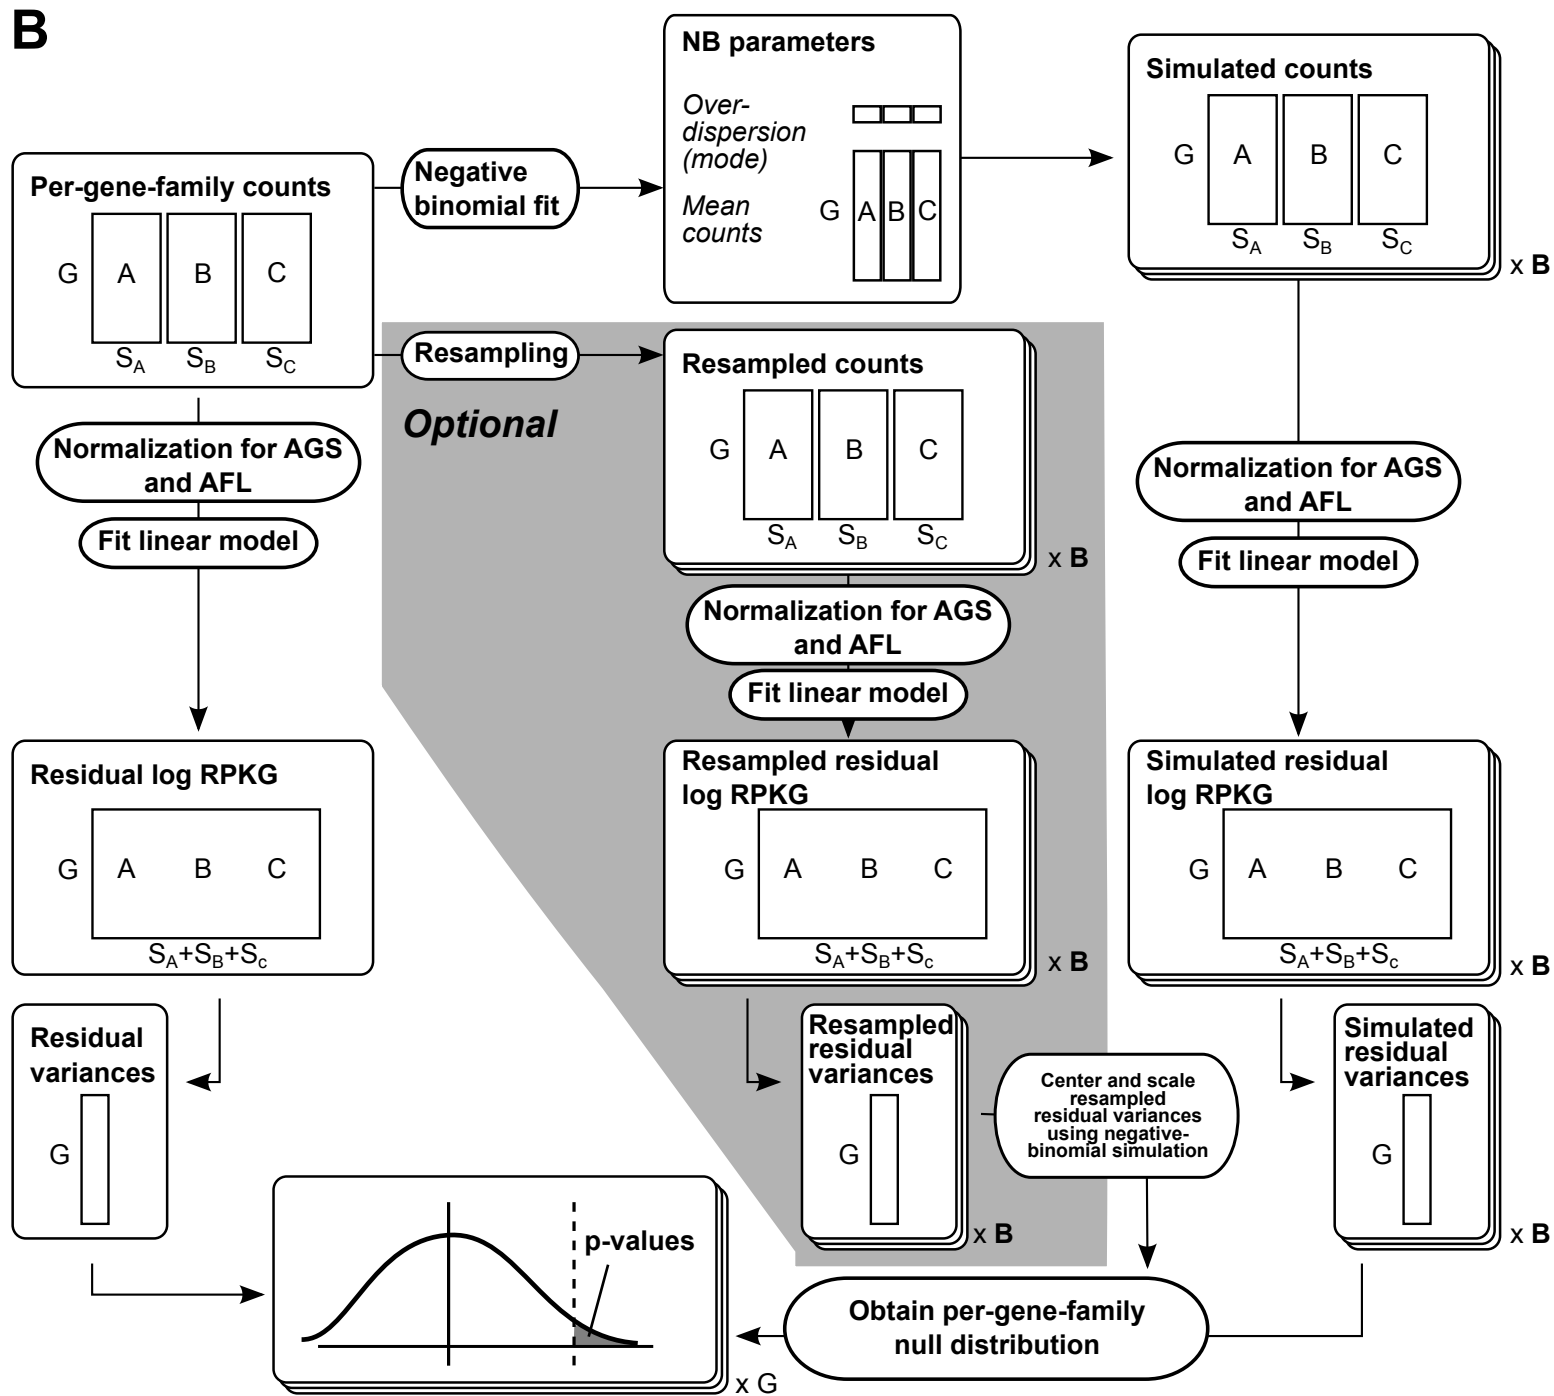

Supplement: Supplementary file [file 056614-1.pdf]
